# Supplementary material for: A Comparative Evaluation of eDNA Metabarcoding Primers in Fish Community Monitoring in the East Lake
Source: Preprints.org preprint supplement (doi:10.20944/preprints202401.0012.v1), 2024-01-03
Supplement: Supplementary file 1 [file supplementary]

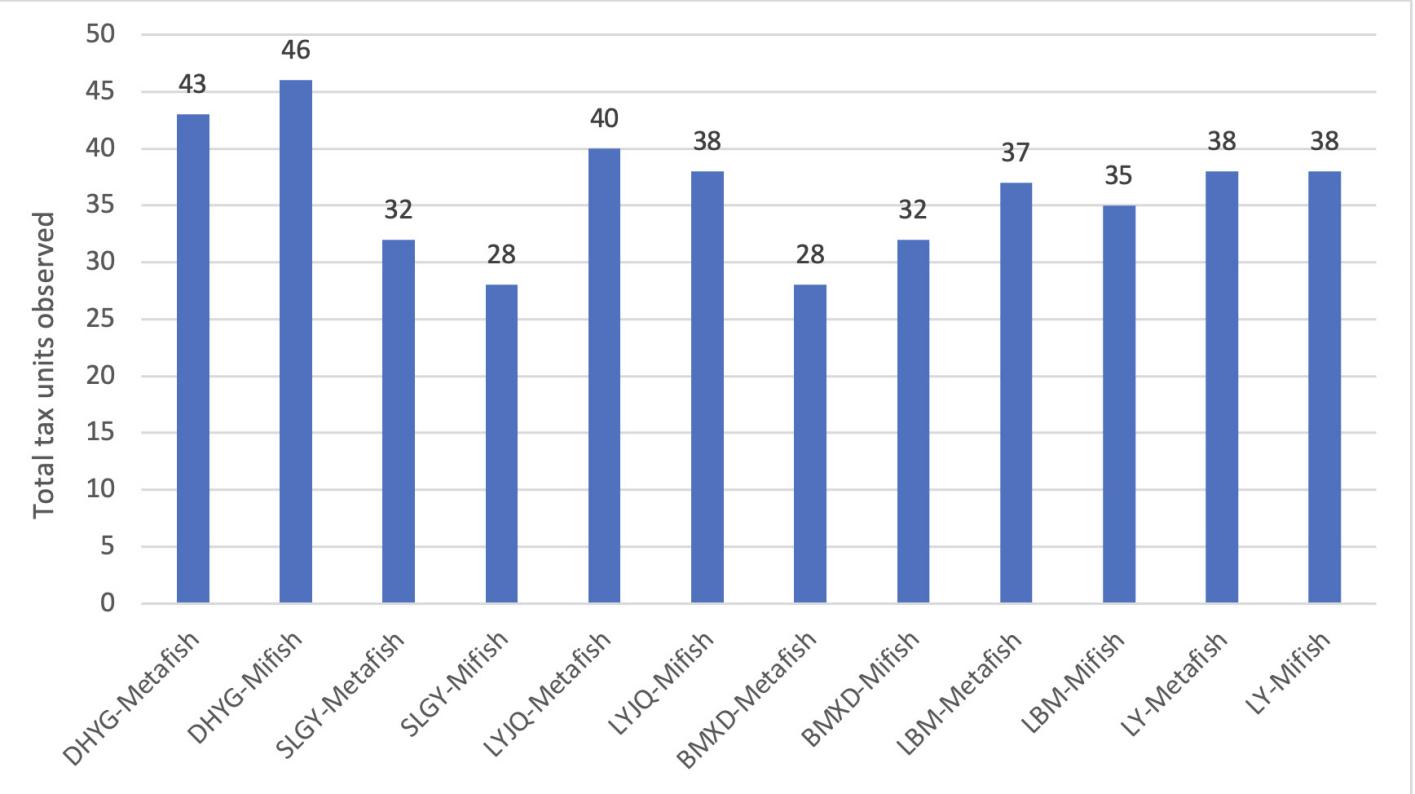

**Figure S1** Barplots showing the number of total taxonomic units detected by both primers at the 6 sampling sites. Darker blue bars represent Metafish, and lighter blue bars represent Mifish.
